# Supplementary material for: Accuracy of Haigis Formula Using Total Keratometry for IOL Power Calculation in Eyes with Previous Myopic and Hyperopic LASIK
Source: Preprints.org preprint supplement (doi:10.20944/preprints202304.1231.v1), 2023-04-29
Supplement: Supplementary file 2 [file supplementary]

## Sheet: TK Italy Colombia
				IOL MASTER								1-month Refraction
ID	Age	Gender	Eye	K	TK	ACD	AL	LT	IOL model	A-constant	IOL power	Sphere	Cyl	SE	a0	a1	a2	ACD	Axial length	RC1	Expected Rx	d	PC	RX'	T1	T2	IOL Power	z1	z2	z	Expected Rx	PE	Absolute PE
ITA-1	57	M	OS	38.49	38.33	2.79	25.89	4.67	TFNT20	119.1	21	0	0	0	-0.036	0.319	0.175	2.79	25.89	8.80511	0	5.38476	37.6486	0	65.1541	44.3835	20.7706	1.2096e+06	32270.3	37.4834	-0.165502	0.165502	0.165502
ITA-2	55	M	OD	38.1	37.27	3.2	27.09	4.91	SN60WF	119	19.5	-0.25	0	-0.25	-0.769	0.234	0.217	3.2	27.09	9.05554	0	5.85833	36.6074	0	62.9249	43.6074	19.3175	1.23177e+06	33766.8	36.4787	-0.128922	-0.121078	0.121078
ITA-3	55	F	OD	38.05	37.82	3.31	29.98	4.17	SN60WF	119	16	-2	0	-2	-0.769	0.234	0.217	3.31	29.98	8.92385	0	6.5112	37.1476	0	56.9266	45.3598	11.5668	1.28323e+06	37608.3	34.1208	-3.1409	1.1409	1.1409
ITA-4	57	M	OS	40.37	40.15	3.72	25.48	4.63	Soleko Fil611	119.1	20.5	0	0	0	0.051	0.14	0.197	3.72	25.48	8.40598	0	5.59136	39.4362	0	67.174	47.2316	19.9424	1.24019e+06	31761.6	39.0467	-0.391327	0.391327	0.391327
ITA-5	53	F	OD	38.41	38.07	3.35	27.12	4.03	ZCB00	119.3	19.5	-0.75	0	-0.75	-1.302	0.21	0.251	3.35	27.12	8.86525	0	6.20862	37.3932	0	63.8887	45.2578	18.6309	1.24011e+06	33700.6	36.7979	-0.599562	-0.150438	0.150438
ITA-6	58	M	OD	41.71	41.31	3.92	25.82	4.02	RayOne	118.6	17.5	-0.5	0	-0.5	1.363	0.4	0.1	3.92	25.82	8.16993	0	5.513	40.5756	0	65.7901	48.7357	17.0545	1.31012e+06	32536.4	40.2663	-0.310457	-0.189543	0.189543
ITA-7	57	F	OS	40.01	39.8	3.55	25.51	4.29	SN60WF	119	20	0	0	0	-0.769	0.234	0.217	3.55	25.51	8.4799	0	5.59737	39.0924	0	67.0931	46.7492	20.3439	1.25283e+06	31852.2	39.3326	0.239496	-0.239496	0.239496
ITA-8	59	M	OS	36.32	35.91	3.94	33.54	3.72	SN60WF	119	11	-2.5	-1	-3	-0.769	0.234	0.217	3.94	33.54	9.3985	0	7.43114	35.2716	0	51.1704	43.8805	7.28992	1.4012e+06	42675.2	32.834	-2.51101	-0.488986	0.488986
ITA-9	43	F	OS	36.52	35.66	3.71	29.41	3.24	SN6AT5	119.2	16.5	-0.5	-0.5	-0.75	-0.323	0.213	0.208	3.71	29.41	9.46439	0	6.58451	35.026	0	58.5311	42.334	16.197	1.28173e+06	36811.9	34.8184	-0.208177	-0.541823	0.541823
ITA-10	57	M	OS	38.06	37.29	3.85	30.55	4.26	SN6AT3	119.2	12.5	0	0	0	-0.323	0.213	0.208	3.85	30.55	9.05068	0	6.85145	36.6271	0	56.3748	45.0981	11.2767	1.38913e+06	38785.2	35.816	-0.819035	0.819035	0.819035
ITA-11	54	F	OD	37.29	36.23	3.26	28.38	4.34	SN60WF	119	21.5	-3.5	0	-3.5	-0.769	0.234	0.217	3.26	28.38	9.31548	0	6.1523	35.5859	0	60.1052	42.5604	17.5447	1.14643e+06	34975.5	32.778	-2.90583	-0.594173	0.594173
ITA-12	59	F	OS	37.99	37.35	3.03	26.23	3.98	SN6AT3	119.2	22	0	0	0	-0.323	0.213	0.208	3.03	26.23	9.03614	0	5.77823	36.686	0	65.3244	43.6047	21.7198	1.18378e+06	32443.4	36.4874	-0.199037	0.199037	0.199037
ITA-13	77	F	OS	38.75	38.36	3.37	27.75	4.82	AAB00	119	16.5	0	-0.5	-0.25	-0.4231	0.3972	0.1796	3.37	27.75	8.79823	0	5.89936	37.678	0	61.1424	45.1978	15.9446	1.30322e+06	34947.1	37.2913	-0.388579	0.138579	0.138579
ITA-14	76	M	OS	37.65	37.19	3.57	29.4	4.15	SA60WF	119	16.5	-1.75	-0.5	-2	-0.769	0.234	0.217	3.57	29.4	9.07502	0	6.44618	36.5288	0	58.2038	44.3446	13.8592	1.2789e+06	36837	34.7179	-1.8512	-0.148804	0.148804
ITA-15	56	M	OS	38.15	37.74	3.33	27.07	5.04	DFT015	119.08	19	0.25	-0.75	-0.125	1.476	0.233	0.122	3.33	27.07	8.94277	0	5.55443	37.0691	0	62.0946	43.8228	18.2718	1.23874e+06	33894.9	36.5467	-0.525712	0.400712	0.400712
ITA-16	60	F	OS	36.85	36.21	3.71	30.34	4.07	SN60WF	119	19.5	-4.5	-1	-5	-0.769	0.234	0.217	3.71	30.34	9.32063	0	6.68292	35.5663	0	56.4736	43.2632	13.2104	1.16858e+06	37451.3	31.2027	-4.6047	-0.395301	0.395301
ITA-17	53	M	OD	35.96	35.46	3.58	29.19	3.67	SA60WF	119	19	-1.75	0	-1.75	-0.769	0.234	0.217	3.58	29.19	9.51777	0	6.40295	34.8296	0	58.6298	41.8085	16.8213	1.20647e+06	36225.7	33.3043	-1.55376	-0.196243	0.196243
ITA-18	65	F	OD	37.38	37.15	3.11	27.13	4.72	SN60WF	119	19	-0.25	0	-0.25	-0.769	0.234	0.217	3.11	27.13	9.08479	0	5.84595	36.4896	0	62.77	43.4228	19.3472	1.24462e+06	33881.6	36.7344	0.244174	-0.494174	0.494174
ITA-19	46	F	OS	39.01	38.5	3.51	28.83	4.23	SN60WF	119	13.5	0	0	0	-0.769	0.234	0.217	3.51	28.83	8.76623	0	6.30845	37.8156	0	59.321	46.0357	13.2852	1.3787e+06	36598.9	37.6705	-0.145302	0.145302	0.145302
ITA-20	56	M	OS	36.26	35.42	3.01	27.8	4.88	SN60WF	119	20	0	-1	-0.5	-0.769	0.234	0.217	3.01	27.8	9.52851	0	5.96794	34.7903	0	61.1944	41.1919	20.0025	1.20154e+06	34535	34.7921	0.00178509	-0.501785	0.501785
ITA-21	55	M	OS	39.69	39.21	3.09	26.14	4.54	SN60WF	119	19.5	0	0	0	-0.769	0.234	0.217	3.09	26.14	8.6075	0	5.62644	38.5129	0	65.1277	45.9688	19.1589	1.25048e+06	32672.4	38.2732	-0.240422	0.240422	0.240422
ITA-22	70	M	OD	39.82	39.69	3.62	26.99	4.39	SN60WF	119	16.5	0	-0.5	-0.25	-0.769	0.234	0.217	3.62	26.99	8.5034	0	5.93491	38.9844	0	63.4526	47.1498	16.3028	1.32076e+06	33996.8	38.8495	-0.13515	-0.11485	0.11485
ITA-23	55	F	OS	41.01	41.01	3.86	24.74	3.37	DFT015	119.1	21.5	0	0	0	1.476	0.233	0.122	3.86	24.74	8.2297	0	5.39366	40.2809	0	69.057	48.1036	20.9534	1.22919e+06	30809.2	39.8969	-0.385763	0.385763	0.385763
ITA-24	56	F	OD	39.37	38.95	3.57	27.08	4.05	SN6AT2	119.2	17.5	0	0.25	0.125	-0.323	0.213	0.208	3.57	27.08	8.66496	0	6.07005	38.2576	0	63.5889	46.3066	17.2823	1.29368e+06	33947.1	38.1088	-0.148995	0.273995	0.273995
ITA-25	52	M	OD	40.45	40.23	3.24	26.25	3.95	Tecnis DCB00	119.3	17.5	0	0	0	-1.302	0.21	0.251	3.24	26.25	8.38926	0	5.96715	39.5148	0	65.8685	47.9834	17.8851	1.31068e+06	32952	39.7756	0.259955	-0.259955	0.259955
ITA-26	52	M	OS	40.45	40.22	4.09	24.57	3.83	SN6AT3	119.2	24	0	-0.5	-0.25	1.024	0.2124	0.151	4.09	24.57	8.39135	0	5.60279	39.505	0	70.4373	47.3495	23.0879	1.17673e+06	30275.1	38.868	-0.641875	0.391875	0.391875
ITA-27	66	F	OS	40.69	40.56	3.5	25.2	4.4	SN60WF	119	20.5	0	0	0	-0.769	0.234	0.217	3.5	25.2	8.32101	0	5.5184	39.8389	0	67.8807	47.686	20.1947	1.24586e+06	31440.7	39.6256	-0.213858	0.213858	0.213858
ITA-28	62	F	OD	42.76	42.56	3.5	24.59	4.47	DFT315	119.1	19.5	0	0	0	1.476	0.233	0.122	3.5	24.59	7.92998	0	5.29148	41.8034	0	69.2281	50.0981	19.13	1.28213e+06	30860.9	41.5454	-0.258757	0.258757	0.258757
ITA-29	60	F	OD	38.89	37.95	3.44	28.16	4.32	SA60WF	119	17	-1	0	-1	-0.769	0.234	0.217	3.44	28.16	8.89328	0	6.14668	37.2753	0	60.6905	44.9912	15.6994	1.28493e+06	35321.5	36.3781	-0.906997	-0.0930029	0.0930029
ITA-30	61	F	OD	39.95	39.66	3.5	25.71	4.4	SA60WF	119	20.5	0	-0.5	-0.25	-0.769	0.234	0.217	3.5	25.71	8.50983	0	5.62907	38.9549	0	66.5308	46.6042	19.9266	1.23492e+06	32031.3	38.5535	-0.403355	0.153355	0.153355
ITA-31	60	M	OS	38.07	37.56	3.14	28.75	4.62	SA60WF	119	17.5	-2.5	0	-2.5	-0.769	0.234	0.217	3.14	28.75	8.98562	0	6.20451	36.8923	0	59.258	44.5199	14.7381	1.25778e+06	35962	34.9753	-1.96212	-0.537883	0.537883
COL-1	52	F	OS	36.98	36.17	3.64	28.19	4.11	CLAREON	119.1	19	0	0	0	-0.399	0.209	0.211	3.64	28.19	9.33094	0	6.30985	35.527	0	61.0599	42.69	18.3699	1.22949e+06	35038.7	35.0895	-0.439783	0.439783	0.439783
COL-2	72	F	OD	44.1	44.34	3.32	23.85	4.37	SN6AT3	119.2	19.5	0	-0.5	-0.25	1.024	0.2124	0.151	3.32	23.85	7.61164	0	5.33052	43.5517	0	72.1402	52.7112	19.429	1.30243e+06	29938.6	43.5033	-0.048496	-0.201504	0.201504
COL-3	65	F	OD	44.49	44.48	2.82	22.11	4.8	TFNT00	119.1	25	0	0	0	-0.036	0.319	0.175	2.82	22.11	7.58768	0	4.73283	43.6892	0	76.8825	51.6892	25.1933	1.2045e+06	27482.9	43.8272	0.137758	-0.137758	0.137758
COL-4	62	F	OD	47.14	47.63	2.65	21.98	4.58	SN6AT2	119.2	22	-0.75	-0.5	-1	1.024	0.2124	0.151	2.65	21.98	7.08587	0	4.90584	46.7832	0	78.2469	56.4872	21.7597	1.28305e+06	27522.5	46.6183	-0.165253	-0.834747	0.834747
COL-5	68	F	OS	49.55	50.21	3.01	23.34	4.31	SN6AT4	119.2	14	-0.25	-0.5	-0.5	1.024	0.2124	0.151	3.01	23.34	6.72177	0	5.18766	49.3174	0	73.5993	60.9985	12.6008	1.44537e+06	29863.9	48.3988	-0.928867	0.428867	0.428867
COL-6	72	M	OD	44.17	44.45	2.94	22.72	4.49	SN6AT3	119.2	24.5	-1	0	-1	-0.769	0.234	0.217	2.94	22.72	7.5928	0	4.8492	43.6598	0	74.7588	51.8814	22.8774	1.19995e+06	28230.8	42.505	-1.17101	0.171005	0.171005
COL-7	67	F	OS	41.25	40.91	3.76	26.94	4.13	CLAREON	119.1	17	0	-1.5	-0.75	-0.399	0.209	0.211	3.76	26.94	8.24982	0	6.07118	40.1827	0	64.019	49.1593	14.8596	1.31092e+06	33838	38.7412	-1.46689	0.716889	0.716889
COL-8	52	M	OD	44.14	43.87	3.32	24.2	4.26	SN6AT3	119.2	19	0.5	0	0.5	1.024	0.2124	0.151	3.32	24.2	7.69318	0	5.38337	43.0901	0	71.001	52.1438	18.8572	1.30725e+06	30406.6	42.9925	-0.0976838	0.597684	0.597684
COL-9	50	M	OD	41.15	40.85	3.31	26.21	4.6	SN6AT2	119.2	18	-0.75	-0.5	-1	1.024	0.2124	0.151	3.31	26.21	8.26193	0	5.68475	40.1238	0	65.0906	48.3844	16.7062	1.2913e+06	32916.3	39.2299	-0.903519	-0.0964807	0.0964807
COL-10	58	M	OS	39.65	39.14	3.51	25.47	3.72	CLAREON	119.1	24.5	-2	-0.5	-2.25	-0.399	0.209	0.211	3.51	25.47	8.62289	0	5.70876	38.4442	0	67.6071	46.0009	21.6062	1.13807e+06	31264	36.4019	-2.09354	-0.156458	0.156458
COL-11	71	F	OS	39.81	39.43	3.46	25.76	4.38	CLAREON	119.1	20.5	1	-1	0.5	-0.399	0.209	0.211	3.46	25.76	8.55947	0	5.7595	38.729	0	66.7983	46.4912	20.3071	1.23712e+06	32053.9	38.5951	-0.134182	0.634182	0.634182
COL-12	57	M	OD	40.91	40.85	3.35	24.76	4.13	SN6AT4	119.2	24.5	-2.25	0	-2.25	1.024	0.2124	0.151	3.35	24.76	8.26193	0	5.4743	40.1238	0	69.2741	48.0184	21.2557	1.15364e+06	30492.8	37.8331	-2.35539	0.105389	0.105389
COL-13	72	F	OI	45.12	44.99	3.14	24.35	4.47	SN6AT7	119.2	18	0	0	0	1.024	0.2124	0.151	3.14	24.35	7.50167	0	5.36779	44.1902	0	70.3817	53.7298	16.6519	1.32841e+06	30697.5	43.2742	-0.926144	0.926144	0.926144
COL-14	70	M	OD	41.01	40.89	3.51	26	3.84	SN60WF	119	18.5	0.25	-1	-0.25	-0.769	0.234	0.217	3.51	26	8.25385	0	5.69434	40.1631	0	65.7945	48.4584	17.3361	1.28302e+06	32596.9	39.3602	-0.810645	0.560645	0.560645
COL-15	52	F	OD	39.67	39.07	3.67	26.51	4.13	SN60WF	119	20	0	0	0	-0.769	0.234	0.217	3.67	26.51	8.63834	0	5.84245	38.3754	0	64.6424	46.1143	18.5281	1.23266e+06	33002.4	37.3506	-1.03757	1.03757	1.03757
COL-16	70	F	OS	42.36	41.81	2.94	25.07	4.52	SN6AT2	119.2	19	0	0	0	1.024	0.2124	0.151	2.94	25.07	8.07223	0	5.43403	41.0667	0	68.0384	49.3018	18.7366	1.28646e+06	31466.2	40.8838	-0.183325	0.183325	0.183325
COL-17	63	F	OS	42.5	42.48	2.89	24.08	4.8	SN6AT5	119.2	21.5	0	-0.5	-0.25	1.024	0.2124	0.151	2.89	24.08	7.94492	0	5.27392	41.7248	0	71.0408	49.9525	21.0883	1.24471e+06	30038.5	41.4372	-0.288602	0.0386021	0.0386021
COL-18	66	F	OS	41.33	41.12	3.31	24.99	4.56	SN60WF	119	21	0	-1	-0.5	-0.769	0.234	0.217	3.31	24.99	8.20768	0	5.42837	40.389	0	68.297	48.3183	19.9786	1.23607e+06	31156.7	39.6728	-0.722337	0.222337	0.222337
COL-19	66	M	OS	40.93	40.69	4.19	25.33	3.92	SN6AT2	119.2	23.5	-2.25	0	-2.25	1.024	0.2124	0.151	4.19	25.33	8.29442	0	5.73879	39.9666	0	68.1938	48.25	19.9438	1.16981e+06	31198.8	37.4954	-2.54676	0.296762	0.296762
COL-20	73	F	OS	39.91	39.99	3.73	28.57	4.11	SN6AT6	119.2	11	0.25	-0.5	0	1.024	0.2124	0.151	3.73	28.57	8.43961	0	6.13032	39.2791	0	59.5374	47.915	11.6224	1.45512e+06	36656.3	39.6963	0.415201	-0.415201	0.415201
																																MYOPIC EYES
	60.3922	29																														Mean PE	MAE
	7.8615																															0.0934886	0.364457
																																0.440499	MedAE
																																	0.259955
																																tot	51
																																<0,25	26
																																%	50.9804
																																<0,50	39
																																%	76.4706
																																<0,75	46
																																%	90.1961
																																<1,00	49
																																%	96.0784
COL-21	73	F	OS	46.71	46.77	2.79	22.83	4.84	CLAREON	119.1	19.5	0	-0.5	-0.25	-0.399	0.209	0.211	2.79	22.83	7.21616	0	5.00124	45.9385	0	74.9351	55.4792	19.4559	1.32042e+06	28762.1	45.9083	-0.0302453	-0.219755	0.219755
COL-22	65	F	OD	42.2	42.08	2.53	23.72	5.07	VIVITY	119.2	22	0	0	0	1.476	0.233	0.122	2.53	23.72	8.02044	0	4.95933	41.3319	0	71.2128	48.8226	22.3902	1.23348e+06	29643	41.6112	0.278364	-0.278364	0.278364
COL-23	62	F	OS	44.83	45.15	3.02	23.25	4.42	CLAREON	119.1	23.5	-2.25	-0.25	-2.375	-0.399	0.209	0.211	3.02	23.25	7.47508	0	5.13793	44.3473	0	73.763	53.4659	20.2971	1.21625e+06	28875.1	42.121	-2.28743	-0.087568	0.087568
COL-24	74	M	OD	45.62	45.68	3.16	22.95	4.57	CLAREON	119.1	21.5	-0.25	-0.75	-0.625	-0.399	0.209	0.211	3.16	22.95	7.38835	0	5.10389	44.8679	0	74.8623	54.1496	20.7127	1.27228e+06	28702.9	44.326	-0.545444	-0.0795564	0.0795564
COL-25	60	F	OS	45.49	45.69	2.89	22.8	4.48	CLAREON	119.1	23.5	-2.25	-0.5	-2.5	-0.399	0.209	0.211	2.89	22.8	7.38674	0	5.01581	44.8777	0	75.1229	53.9712	21.1518	1.22654e+06	28364.6	43.2421	-1.66835	-0.831652	0.831652
COL-26	65	F	OS	45.29	45.41	2.84	22.2	4.87	TFNT00	119.1	23	0	-0.5	-0.25	-0.036	0.319	0.175	2.84	22.2	7.43228	0	4.75496	44.6027	0	76.5834	53.0193	23.5641	1.24884e+06	27751.3	45.0012	0.396637	-0.646637	0.646637
COL-27	77	F	OS	44.89	45.28	3.44	23.85	4.79	SN6AT3	119.2	19	0.25	0	0.25	1.024	0.2124	0.151	3.44	23.85	7.45362	0	5.35601	44.475	0	72.2397	54.1256	18.1141	1.31544e+06	29981.6	43.8751	-0.604277	0.854277	0.854277
COL-28	60	F	OD	42.9	42.69	3.35	23.9	4.81	SN6AT4	119.2	22	0.25	-1.25	-0.375	1.024	0.2124	0.151	3.35	23.9	7.90583	0	5.34444	41.9311	0	72	50.3821	21.6179	1.23951e+06	29748.7	41.6661	-0.265829	-0.109171	0.109171
COL-29	67	F	OD	46.26	46.57	3.58	23.92	4.16	SN6AT3	119.2	20	-2.75	-0.25	-2.875	1.024	0.2124	0.151	3.58	23.92	7.24715	0	5.39631	45.7421	0	72.1239	56.1087	16.0152	1.28994e+06	29957.9	43.0585	-2.7729	-0.102102	0.102102
COL-30	60	F	OD	42.9	42.69	3.35	23.9	4.81	SN6AT4	119.2	22	0.25	-1.25	-0.375	1.024	0.2124	0.151	3.35	23.9	7.90583	0	5.34444	41.9311	0	72	50.3821	21.6179	1.23951e+06	29748.7	41.6661	-0.265829	-0.109171	0.109171
COL-31	63	F	OS	45.43	45.77	3	23.72	4.8	SN6AT2	119.2	21	-2	-0.75	-2.375	1.024	0.2124	0.151	3	23.72	7.37383	0	5.24292	44.9563	0	72.3058	54.5867	17.7191	1.2665e+06	29655.6	42.7071	-2.31161	-0.0633864	0.0633864
COL-32	53	F	OD	45.26	45.63	3.03	21.79	4.71	SN6AT5	119.2	25	0	-1	-0.5	1.024	0.2124	0.151	3.03	21.79	7.39645	0	4.95786	44.8188	0	79.372	53.7603	25.6117	1.2227e+06	27025.2	45.2431	0.422181	-0.922181	0.922181
COL-33	75	M	OD	47.25	47.72	2.61	22.09	5.24	SN6AT5	119.2	22	-0.25	0	-0.25	1.024	0.2124	0.151	2.61	22.09	7.07251	0	4.91395	46.8716	0	77.7827	56.6356	21.1472	1.28006e+06	27655.4	46.286	-0.589778	0.339778	0.339778
COL-34	72	F	OD	46.89	47.37	2.53	21.72	4.85	CLAREON	119.1	23.5	0	-1	-0.5	-0.399	0.209	0.211	2.53	21.72	7.12476	0	4.71269	46.5279	0	78.5545	55.6637	22.8908	1.25093e+06	27134.4	46.1014	-0.42862	-0.0713803	0.0713803
COL-35	79	F	OD	48.17	48.74	2.86	22.41	4.94	CLAREON	119.1	19	0.5	-1.25	-0.125	-0.399	0.209	0.211	2.86	22.41	6.9245	0	4.92725	47.8735	0	76.4182	58.1385	18.2797	1.34111e+06	28303.1	47.3841	-0.492351	0.367351	0.367351
COL-36	69	F	OS	47.17	47.76	2.65	21.82	4.23	CLAREON	119.1	25.5	-1.75	-0.5	-2	-0.399	0.209	0.211	2.65	21.82	7.06658	0	4.75887	46.9109	0	78.3067	56.3223	21.9844	1.20366e+06	27081.1	44.4463	-2.5397	0.539696	0.539696
COL-37	66	F	OD	42.72	42.9	2.79	23.64	5.02	SN60WF	119	22.5	-0.5	0	-0.5	-0.769	0.234	0.217	2.79	23.64	7.86713	0	5.01374	42.1373	0	71.7267	50.0522	21.6744	1.22499e+06	29481.8	41.5507	-0.59079	0.0907903	0.0907903
COL-38	71	M	OS	45.33	45.51	2.94	21.97	4.48	SN6AT8	119.2	24.5	0	0	0	1.024	0.2124	0.151	2.94	21.97	7.41595	0	4.96593	44.7009	0	78.5694	53.6081	24.9613	1.22832e+06	27283.1	45.0212	0.319041	-0.319041	0.319041
COL-39	66	F	OD	46.62	47.12	2.61	22.94	4.96	SN60WF	119	21.5	-2.5	-1	-3	-0.769	0.234	0.217	2.61	22.94	7.16256	0	4.81972	46.2823	0	73.7295	55.5588	18.1708	1.26441e+06	28770.1	43.9487	-2.40089	-0.599107	0.599107
COL-40	60	F	OS	42.78	42.99	3	22.7	4.25	SN60WF	119	25	-0.25	-0.75	-0.625	-0.769	0.234	0.217	3	22.7	7.85066	0	4.8589	42.2257	0	74.8833	49.8869	24.9964	1.189e+06	28160	42.2231	-0.00260176	-0.622398	0.622398
COL-41	61	M	OI	45.96	46.06	3.22	22.47	4.34	CLAREON	119.1	22	0.5	-0.25	0.375	-0.399	0.209	0.211	3.22	22.47	7.3274	0	5.01515	45.2412	0	76.5403	54.4962	22.0442	1.27186e+06	28094.1	45.2716	0.0304192	0.344581	0.344581
COL-42	74	F	OD	44.08	43.97	2.97	22.68	4.82	CLAREON	119.1	23.5	1	-1.25	0.375	-0.399	0.209	0.211	2.97	22.68	7.67569	0	5.00721	43.1883	0	75.5964	51.5291	24.0673	1.23004e+06	28220.9	43.5861	0.395923	-0.0209232	0.0209232
COL-43	63	M	OD	44.13	44.6	2.81	23.72	4.61	SN60WF	119	23	-3.25	0	-3.25	-0.769	0.234	0.217	2.81	23.72	7.56726	0	5.03578	43.8071	0	71.5042	52.4713	19.0329	1.21077e+06	29525.9	41.007	-2.89746	-0.352545	0.352545
COL-44	62	M	OD	45.12	45.02	3.15	22.82	4.51	SN60WF	119	21.5	0.25	0	0.25	-0.769	0.234	0.217	3.15	22.82	7.49667	0	4.92004	44.2196	0	74.637	52.8214	21.8156	1.27074e+06	28594	44.4406	0.220404	0.0295957	0.0295957
COL-45	66	F	OS	47.22	47.34	3.06	22.06	4.39	SN60WF	119	21.5	0	-2	-1	-0.769	0.234	0.217	3.06	22.06	7.12928	0	4.73406	46.4984	0	77.1098	55.671	21.4388	1.28723e+06	27708.7	46.4557	-0.0427476	-0.957252	0.957252
COL-46	73	F	OD	41.87	41.87	2.81	24.52	5.04	SN60WF	119	21.5	-0.75	-0.5	-1	-0.769	0.234	0.217	2.81	24.52	8.06066	0	5.20938	41.1256	0	69.1847	48.98	20.2047	1.23022e+06	30595.9	40.2086	-0.927265	-0.0727354	0.0727354
COL-47	80	M	OS	43.19	43.16	2.73	23.9	5.33	SN6AT4	119.2	24	-2.75	-0.75	-3.125	1.024	0.2124	0.151	2.73	23.9	7.81974	0	5.21275	42.3927	0	71.4926	50.7944	20.6982	1.18571e+06	29592.5	40.0678	-2.39159	-0.733408	0.733408
COL-48	64	M	OD	45.06	45.42	2.89	22.9	4.34	SN6AT2	119.2	21.5	-0.5	-0.75	-0.875	1.024	0.2124	0.151	2.89	22.9	7.43065	0	5.09574	44.6125	0	75.0382	53.7604	21.2778	1.27349e+06	28643.8	44.4594	-0.153401	-0.721599	0.721599
COL-49	70	F	OD	47.56	47.94	2.77	22.17	5.12	SN6AT7	119.2	20	1.25	-3	-0.25	1.024	0.2124	0.151	2.77	22.17	7.04005	0	4.96002	47.0877	0	77.6294	57.0634	20.566	1.32505e+06	27911.9	47.4724	0.382941	-0.632941	0.632941
COL-50	63	M	OD	44.13	44.6	2.81	23.72	4.61	SN60WF	119	23	-3.25	0	-3.25	-0.769	0.234	0.217	2.81	23.72	7.56726	0	5.03578	43.8071	0	71.5042	52.4713	19.0329	1.21077e+06	29525.9	41.007	-2.89746	-0.352545	0.352545
COL-51	65	F	OS	45.04	45.07	2.43	21.66	4.74	SN6AT5	119.2	26.5	0.5	0	0.5	1.024	0.2124	0.151	2.43	21.66	7.48835	0	4.81079	44.2688	0	79.2916	52.6637	26.6278	1.18837e+06	26789.7	44.3591	0.0901974	0.409803	0.409803
COL-52	72	F	OD	42.99	43.19	2.73	23.72	4.84	SN60WF	119	21	0	-0.5	-0.25	-0.769	0.234	0.217	2.73	23.72	7.81431	0	5.01706	42.4222	0	71.4326	50.461	20.9716	1.26017e+06	29719.4	42.4021	-0.0200527	-0.229947	0.229947
COL-53	59	M	OD	41.28	41.34	3.24	23.87	4.68	SN60WF	119	23.5	0	0	0	-0.769	0.234	0.217	3.24	23.87	8.16401	0	5.16895	40.6051	0	71.4398	48.1731	23.2668	1.19776e+06	29618.7	40.4392	-0.16615	0.16615	0.16615
COL-54	62	F	OS	47.19	47.82	3.37	23.03	3.74	SN60WF	119	20	-2	-0.5	-2.25	-0.769	0.234	0.217	3.37	23.03	7.05772	0	5.01709	46.9699	0	74.169	57.029	17.14	1.30359e+06	28960.6	45.0125	-2.00443	-0.245573	0.245573
COL-55	63	F	OD	42.63	42.78	1.7	22.74	5.93	SN60AT	118.8	24	-0.75	0	-0.75	-1.501	0.285	0.235	1.7	22.74	7.8892	0	4.3274	42.0195	0	72.559	48.6395	23.9195	1.19451e+06	28468.4	41.9594	-0.0601296	-0.68987	0.68987
COL-56	66	M	OD	43.6	43.64	3.28	22.87	4.07	SN60WF	119	23.5	0	0	0	-0.769	0.234	0.217	3.28	22.87	7.73373	0	4.96131	42.8642	0	74.6007	50.9789	23.6217	1.22263e+06	28466.3	42.9502	0.0859379	-0.0859379	0.0859379
COL-57	71	F	OS	46.49	46.46	3.62	22.89	4.37	SN60WF	119	22.5	-1.75	-0.75	-2.125	-0.769	0.234	0.217	3.62	22.89	7.26431	0	5.04521	45.634	0	74.8678	55.1356	19.7322	1.24848e+06	28555.3	43.7215	-1.95751	-0.167491	0.167491
COL-58	57	F	OD	47.22	47.7	2.82	22.12	4.58	SN60WF	119	20	0.5	-1	0	-0.769	0.234	0.217	2.82	22.12	7.07547	0	4.69092	46.852	0	76.6535	56.077	20.5765	1.31919e+06	27917.2	47.2538	0.399854	-0.399854	0.399854
COL-59	73	F	OD	45.93	46.15	2.94	22.84	4.58	CLAREON	119.1	21	0.5	-0.5	0.25	-0.399	0.209	0.211	2.94	22.84	7.31311	0	5.0347	45.3296	0	75.0338	54.6682	20.3657	1.28535e+06	28631.7	44.8926	-0.439306	0.689306	0.689306
COL-60	63	M	OD	41.92	41.85	3.78	24.45	4.06	CLAREON	119.1	21.5	0	-0.5	-0.25	-0.399	0.209	0.211	3.78	24.45	8.06452	0	5.54997	41.106	0	70.6877	49.5708	21.117	1.24201e+06	30410	40.8423	-0.264584	0.0145841	0.0145841
COL-61	75	F	OD	45.13	45.51	2.86	22.8	4.43	SN60WF	119	25.5	-2.25	0	-2.25	-0.769	0.234	0.217	2.86	22.8	7.41595	0	4.84784	44.7009	0	74.42	53.3553	21.0647	1.1733e+06	28241.6	41.5452	-3.27991	1.02991	1.02991
COL-62	72	M	OS	44.13	44.35	2.79	22.84	4.68	SN6AT3	119.2	23.5	-0.5	-0.5	-0.75	1.024	0.2124	0.151	2.79	22.84	7.60992	0	5.06544	43.5616	0	75.1636	52.1797	22.9839	1.22685e+06	28398.4	43.2012	-0.361885	-0.388115	0.388115
																																HYPEROPIC
	66.9286	29																														Mean PE	MAE
	6.32221																															-0.148485	0.380667
																																0.462266	MedAE
																																	0.34218
																																tot	42
																																<0,25	18
																																%	42.8571
																																<0,50	28
																																%	66.6667
																																<0,75	37
																																%	88.0952
																																<1,00	41
																																%	97.619
